# Supplementary material
Source: publisher figshare collection journal article supplement (https://karger.figshare.com/ndownloader/files/13370105)
Supplement: Supplementary file 1 [file 13370105]

## **Methods**

Optimal body positions for medical photography of candidate areas for HS involvement [4] were evaluated. Pictures of volunteers were taken, and indicative scientific graphics were designed.
